1  
2  
3  
4  
5  
6  
7  
8  
9  
10  
11  
12  
13  
14  
15  
16  
17  
18  
19  
20  
21  
22  
23

**Full Title: Lifetime Intimate Partner Violence (IPV) Against Mozambican Women: Individual and Contextual Level Factors Driving Its Prevalence**

**Short Title: Lifetime Intimate Partner Violence (IPV) Among Mozambican Women**

Maud Z Muosieyiri<sup>1,2,¶</sup>, Nazeem Muhajarine<sup>1,2,#¶</sup>

<sup>1</sup>Department of Community Health and Epidemiology, College of Medicine, University of Saskatchewan, Saskatoon, Saskatchewan, Canada

<sup>2</sup> Mozambique-Canada Maternal Health Project, Inhambane Province, Mozambique

# Corresponding author  
[nazeem.muhajarine@usask.ca](mailto:nazeem.muhajarine@usask.ca) (NM)

¶ The authors contributed equally to this work

## 24 **Abstract**

25 **Background:** Intimate partner violence (IPV) remains a significant public health issue in  
26 Mozambique. This study uses data from the 2022-2023 Mozambique Demographic and Health  
27 Survey (DHS) to examine the prevalence and sociodemographic determinants of Lifetime IPV  
28 among women.

29 **Methods:** A nationally representative sample of 4,813 women aged 15-49 was analyzed to assess  
30 the prevalence of Lifetime IPV. Logistic regression models were used to identify individual- and  
31 contextual-level factors associated with Lifetime IPV.

32 **Results:** Nearly 1 in 4 women (23.07%) reported experiencing physical abuse from a current or  
33 former partner in their lifetime. Marital status emerged as a key individual-level determinant, with  
34 married, cohabitating, and separated women being at significantly higher odds of experiencing  
35 IPV compared to women who had never been in a union. Educational attainment and current  
36 employment were also associated with increased odds of IPV. Similarly, women who justified  
37 physical abuse had higher odds of experiencing IPV. Additionally, husbands/partners' alcohol  
38 consumption was one of the strongest predictors, nearly tripling the odds of Lifetime IPV. Finally,  
39 the effect modification between marital status and education showed that the intersection of these  
40 factors further shaped IPV risk. At the contextual level, provincial disparities were observed, with  
41 Cabo Delgado and Manica showing the highest IPV prevalence, while Inhambane and Gaza had  
42 the lowest.

43 **Conclusion:** This study provides updated data on the prevalence of Lifetime IPV in Mozambique  
44 and highlights key individual and contextual factors contributing to IPV. The findings underscore  
45 the need for targeted interventions addressing socio-cultural norms, improving educational

46 opportunities, mitigating alcohol consumption, and implementing province-specific strategies to  
47 reduce IPV and enhance women's safety across Mozambique.

## 48 **Background**

49 Intimate Partner Violence (IPV) remains a major public health, social and moral issue  
50 affecting women worldwide. Addressing IPV is therefore key to achieving Sustainable  
51 Development Goals (SDGs) on gender equity (SDG 5), quality education (SDG 4), and health and  
52 wellbeing (SDG 3). According to the World Health Organization (WHO), nearly 27% of women  
53 aged 15 to 49 who have ever been in a relationship report having experienced physical and/or  
54 sexual violence by their intimate partner.(1) Physical violence perpetrated by a partner leads to  
55 multiple adverse health outcomes in women, for example, injuries, trauma, mental health effects,  
56 chronic conditions, and, among pregnant women, pregnancy complications like miscarriages and  
57 pre-term births.(1–3) Although IPV is prevalent across all societies and cultures, reportedly, it is  
58 highest within Latin America (31%), South-East Asia (33%), and Sub-Saharan Africa (SSA)  
59 (33%).(1,4)

60 In Sub-Saharan Africa, IPV prevalence differs by geographic location, likely due to  
61 variations in socio-cultural beliefs, gender norms, and economic inequality. For instance, a multi-  
62 country study in SSA showed that 50% of women in Ethiopia reported having experienced IPV in  
63 their lifetime, while only 17% of women in Namibia had ever experienced IPV.(5,6) Another  
64 pooled analysis of 26 African countries found that while 14% of pregnant women in South Africa  
65 having experienced physical violence during pregnancy, only 2.1% of those in Burkina Faso  
66 reported experiencing the same.(7) Ahinkorah et al., (2023) and colleagues determined that Gabon  
67 had the highest prevalence of IPV against women (45.3%), while Comoros had the lowest

68 prevalence (4.9%) in their study of 84,486 women across 18 countries.(3) It is clear, given these  
69 reported data from across numerous countries, that understanding and addressing the specific  
70 socio-cultural, economic and gendered factors driving IPV at individual and contextual levels is  
71 essential for creating safer societies for women across Africa.(4,8)

72 African cultural traditions and gender norms widely reinforce men's dominance as  
73 breadwinners and decision-makers in intimate partner relationships, making women more  
74 vulnerable to unjust treatment.(9,10) These norms intersect and interact with individual  
75 characteristics such as marital status, education, employment, attitudes towards abuse, and  
76 substance use; this shapes women's susceptibility to, or protection from, IPV. The prevailing  
77 literature demonstrates that cohabitating/married women have a higher likelihood of experiencing  
78 IPV than their single counterparts. Cruz et al., (2014) revealed that cohabitating/married women  
79 had 1.53 times higher odds of experiencing physical violence compared to single women (OR =  
80 2.53, 95% CI = 1.22, 4.74).(6) Ahinkorah and colleagues, in a notable finding, reported that  
81 cohabitating women are more likely to experience IPV than married women; possibly because  
82 women often may compromise more once they are married or feel that they have fewer options,  
83 resulting in less conflict with their husbands.(3)

84 Evidence also suggests that a woman's higher level of education and employment, both  
85 general markers of women empowerment, can either reduce susceptibility to or trigger IPV,  
86 depending on the context.(11,12) On one hand, some studies show that higher education level and  
87 employment reduce the odds of IPV by increasing social networks and support, sources of  
88 information, leading to greater autonomy and better bargaining power in relationships.(3,4,8,13)  
89 For example, a study analyzing IPV among women across 16 Indian states determined that women  
90 with a higher than secondary education were 59% less likely to experience IPV compared to

91 women with no formal education (OR = 0.41, 95% CI = 0.36, 0.46).(13) In contrast, in  
92 communities with rigid gender roles and acceptable views of and relaxed attitudes about physical  
93 violence, women's higher education and employment increase their risk of experiencing IPV.(8)  
94 Cools and Kotsadam revealed that African women who achieved either a primary or a secondary  
95 education were significantly more likely to experience IPV, compared to those without formal  
96 education, the likelihood rising by 5.3 and 3.1 percentage points, respectively. . . Ahinkorah and  
97 colleagues (2018) showed that employed women had 33% higher odds of experiencing physical  
98 violence from their husbands/partners (OR = 1.33, 95% CI = 1.28, 1.37) compared to non-  
99 employed women.(4,7)

100 Researchers have hypothesized that women's empowerment and IPV occur because  
101 empowered women challenge traditional, unfavourable (to women) gender roles, including  
102 questioning male authority.(8,14) Additionally, women's attitudes towards IPV shape their  
103 vulnerability to experiencing it.(15) A population-based survey showed that IPV justification  
104 trends align with global IPV prevalence, with higher justification rates in South and Southeast Asia  
105 (47%) and Sub-Saharan Africa (38%) compared to Central and West Asia and Europe  
106 (29%).(15,16) Another study of African countries showed that pregnant women who justified IPV  
107 had a higher likelihood of experiencing physical violence than those who did not.(7) Scientists  
108 argue that in societies where women justify IPV, they are less likely to oppose it or to report it,  
109 thus increasing its occurrence.(17) Furthermore, alcohol use and abuse by women's  
110 husbands/partners are consistently linked to higher rates of IPV.(18) Alcohol consumption can  
111 lower inhibitions, impair functioning, and heighten depressive symptoms, all of which may  
112 increase the likelihood of violence against women.(7)

113 At the contextual level, access to resource and wealth (as measured by wealth index), and  
114 rural/urban living have been reported to influence IPV trends. The Wealth Index is an aggregate  
115 score that measures the relative wealth of household's wealth and may serve as a proxy for  
116 socioeconomic status.(3,19) Generally, women in the poorest wealth status are more likely to  
117 experience IPV than those in the richest category.(3,8) Stockl et al. showed that there is a  
118 significant decrease in the odds of experiencing IPV in richer households, compared to those in  
119 the middle and poorest tertile of the wealth measurement.(8) A strong supporting argument is that  
120 women within the richest wealth group are more resourced to fight for their rights and seek help  
121 against physical abuse compared to those of the poorest index.(7) Another argument is that  
122 financial stress is likely to be lesser reason for conflict in these well-endowed households.(3,8)  
123 There is mixed evidence concerning the influence of rural/urban living and IPV prevalence. Some  
124 studies show that rural living increases the odds of IPV due to rigid gender norms,(6) while others  
125 suggest that living in rural settings decreases IPV risk since women in these settings maybe more  
126 subservient, thus reducing any resistance to their husbands/partners dominance and  
127 aggression(7,17,20)

128 Mozambique, a southeastern African country, has historically had one of the continent's  
129 highest IPV prevalence; the 2011 DHS report indicated that 33% of women had experienced  
130 physical violence since age 15.(17) Nevertheless, research suggests that this statistic is lower than  
131 the actual estimate due to underreporting, since IPV is often seen as a private issue, discouraging  
132 women from reporting violence and seeking support.(6,17,20) For instance, a 2011 study  
133 conducted in Zambezia, a central province in Mozambique, portrayed that 70% of participants  
134 admitted they never sought help or disclosed incidents of violence against them.(17,21) Despite  
135 historical reports, current data on IPV and its structural and sociodemographic drivers are largely

136 unknown in Mozambique. This data gap makes it challenging to develop and implement effective  
137 policies and protocols to ensure the welfare and safety of women across the country. Nationally,  
138 the Mozambique Constitution establishes gender equality in all areas of society and prohibits all  
139 legislative, political, cultural, economic, and social discrimination. Many state bodies tasked with  
140 preventing and ending gender-based violence exists. However, lack of reliable and country-wide  
141 contemporary data hampers evidence-based action on this front. This present study, therefore,  
142 sought to address this evidence gap by utilizing the most recent Mozambique DHS data (2022-  
143 2023) to investigate the Lifetime IPV prevalence and its associated sociodemographic and  
144 structural factors among 15- to 49-year-old women in Mozambique.

## 145 **Methods**

### 146 **Data Source**

147 The present study analyzes information from a secondary data source, the 2022-2023  
148 Mozambique DHS data.(19) The DHS, funded by the United States Agency for International  
149 Development (USAID), is a global survey that is conducted in over 85 low- and middle-income  
150 countries. We received approval from the DHS program to access de-identified datasets for the  
151 2022-2023 Mozambique reports, which were provided on June 17, 2024. Thus, participant  
152 confidentiality was maintained throughout our analyses, and no information can be directly linked  
153 to any individual.

154 The 2022-23 Mozambique DHS was a nationwide, population-based cross-sectional survey  
155 that covered all 10 provinces (Niassa, Cabo Delgado, Nampula, Zambezia, Tete, Manica, Sofala,  
156 Inhambane, Gaza, and Maputo) as well as the capital city region of Maputo, which holds provincial  
157 status. Data collection followed a two-stage stratified sampling design. In the first stage, clusters  
158 (enumeration areas, EAs) were selected based on “IV Recenseamento Geral da População e

159 Habitação 2017” (IV RGPH 2017)).(22) A total of 619 recorded areas were chosen using  
160 probability-proportional-to-size, determined by the number of households in each explicit stratum.  
161 In the second stage, 26 households were systematically selected equally from each area. This  
162 process resulted in the selection of 16,045 households for data collection. All women aged 15–49  
163 years who were either residents or visitors in the household the night before the interviews were  
164 eligible to participate. In a subsample of half of the selected households, all men aged 15–54 years  
165 were also eligible for interviews.(19) For our analyses, we utilized data from a sub-group of  
166 women within the Individual Women Recode (IR) file who were randomly selected to complete  
167 the Domestic Violence module (N=4,813).

## 168 **Variables**

169 **Outcome Variable:** We define the outcome variable, Lifetime Intimate Partner Violence (IPV),  
170 as any physical violence experienced by women from a current or former partner since the age of  
171 15. This variable was derived from multiple questions according to the guidelines within the DHS-  
172 8 Guide to Statistics Manual.(23) A “Yes” response to any of the following questions met the  
173 criteria for Lifetime IPV: (a) Ever been pushed, shook or had something thrown by  
174 husband/partner; (b) Ever been slapped by husband/partner (c) Ever been punched with fist or hit  
175 by something harmful by husband/partner (d) Ever been kicked or dragged by husband/partner (e)  
176 Ever been strangled or burnt by husband/partner (f) Ever been attacked with knife/gun or other  
177 weapon by husband/partner (g) Ever CS physical violence by husband/partner (h) Ever had arm  
178 twisted or hair pulled by husband/partner (i) Previous husband: ever hit, slap, kick or physically  
179 hurt respondent. The outcome variable was dichotomized (“Yes”/ “No”) for all analyses.

180 **Independent Variables:** Seminal articles on IPV in Sub-Saharan Africa, like that of Ahinkorah  
181 et al., (2023) (7) as well as the adapted theoretical framework from Azevêdo et al (24) (**S1 Fig**),



182 guided the selection of the independent variables. These variables were divided into Individual-  
183 level and Contextual-level factors. The Individual-level factors include (a) Maternal Age (b)  
184 Husband/Partner's Age (c) Maternal Educational Level (d) Husband/Partner's Educational Level  
185 (e) Woman's Marital Status (f) Woman's Current Employment Status (g) Woman's Access to  
186 Media (h) Woman's Justification for Beatings and (i) Husband/Partner's Alcohol Intake.  
187 Contextual-level variables, but applied at individual level, comprised of (a) Wealth Index (b) Type  
188 of Place of Residence, and (c) Province of Residence. The supplemental material contains all the  
189 details of these variables, including their categorizations (**S2 Table**).

190 **Data Analysis:** Study population characteristics were summarized as counts and frequencies for  
191 all independent variables and presented in Table 1. Lifetime IPV (**Fig 1**) as well as IPV  
192 experienced within the last 12 months (**S3 Fig**) were also quantified as counts and frequencies and  
193 presented as figures. Additionally, binary logistic regression analysis was used to assess the  
194 association between Lifetime IPV and each independent variable, estimating the unadjusted odds  
195 ratios (OR) with their 95% confidence intervals (CI) (**S4 Table**). All variables with a bivariate  
196 association at  $p\text{-value} \leq 0.20$  were included in the multivariable logistic regression model in a  
197 stepwise process to achieve the most parsimonious final model. Selected (based on theoretical  
198 framework) variables were also tested for effect modifications. Finally, the Hosmer-Lemeshow  
199 test was used to determine the model's goodness-of-fit. Because of smaller cell counts within the  
200 highest 2 categories of the variables: "Husband/Partner's Age" and "Husband/Partner's  
201 Educational Level", these categories were merged to ensure sufficient sample in both the bivariate  
202 and multivariate analyses. All adjusted odds ratios, their 95% CIs, and corresponding p-values are  
203 reported in Table 2. The analyses were performed using SAS 9.4M8.

## 204 **Results**

## 205 **Sample Characteristics**

206 Table 1 summarizes the background characteristics of the study population. The study  
207 population consisted of 4,813 women in Mozambique, with the largest proportion being between  
208 the ages of 15 and 24 (38.42%). In contrast, the majority of their husbands/partners were in the 25  
209 to 34 age range (34.40%). Regarding marital status, most participants were either living with a  
210 partner (43.24%) or were married (25.74%). Educationally, the largest proportion of women  
211 (42.84%), and their husbands/partners (39.34%), had completed primary education, while only  
212 3.26% and 4.01% had attained an education higher than secondary level, respectively. Concerning  
213 employment status, 63.89% of the women were unemployed at the time of the survey. Media  
214 access reported was limited, with more than half of the women reporting less than once-weekly  
215 access (59.67%). In terms of stating IPV was justified, the vast majority of women did not justify  
216 violence (82.86%). About one-third of the women stated that their husbands/partners (33.14%)  
217 consumed alcohol. Rural living was prevalent among the participants, with 60.07% residing in  
218 rural areas. The wealth distribution showed an even spread, with 16.12% in the poorest category  
219 and 25.74% in the richest category. Of the participants, 10.89% resided in Cabo Delgado, 11.47%  
220 in Nampula, and 9.12% in Niassa province.

221 **Table 1. Background Information on Study Population (N=4,813). Demographic and Health**  
222 **Survey, 2022-2023, Mozambique**

| Variable                              | Frequency (N) | Frequency (%) |
|---------------------------------------|---------------|---------------|
| <b>Woman's Age (N=4813)</b>           |               |               |
| 15 – 24                               | 1849          | 38.42         |
| 25 – 34                               | 1501          | 31.19         |
| 35 – 44                               | 1077          | 22.38         |
| ≥ 45                                  | 386           | 8.02          |
| <b>Husband/Partner's Age (N=3320)</b> |               |               |
| 15 – 24                               | 442           | 13.31         |
| 25 – 34                               | 1142          | 34.40         |

|                                                                        |      |       |
|------------------------------------------------------------------------|------|-------|
| 35 – 44                                                                | 955  | 28.77 |
| ≥ 45                                                                   | 781  | 23.52 |
| <b>Woman’s Marital Status (N=4813)</b>                                 |      |       |
| Never in Union                                                         | 821  | 17.06 |
| Married                                                                | 1239 | 25.74 |
| Living with a Partner                                                  | 2081 | 43.24 |
| No longer living together/separated                                    | 672  | 13.96 |
| <b>Woman’s Educational Level (N=4813)</b>                              |      |       |
| No Formal Education                                                    | 1223 | 25.41 |
| Primary                                                                | 2062 | 42.84 |
| Secondary                                                              | 1371 | 28.49 |
| Higher                                                                 | 157  | 3.26  |
| <b>Husband/Partner’s Educational Level (N=3320)</b>                    |      |       |
| No Formal Education                                                    | 1025 | 30.87 |
| Primary                                                                | 1306 | 39.34 |
| Secondary                                                              | 856  | 25.78 |
| Higher                                                                 | 133  | 4.01  |
| <b>Woman’s Current Employment Status (N=4813)</b>                      |      |       |
| No                                                                     | 3075 | 63.89 |
| Yes                                                                    | 1738 | 36.11 |
| <b>Woman’s Access to Media (N=4813)</b>                                |      |       |
| Less than Once a Week                                                  | 2872 | 59.67 |
| At Least Once a Week                                                   | 1941 | 40.33 |
| <b>Woman’s Justification for Beating from Husband/Partner (N=4813)</b> |      |       |
| No justification                                                       | 3988 | 82.86 |
| Moderate Justification                                                 | 473  | 9.83  |
| Moderate-to-complete Justification                                     | 352  | 7.31  |
| <b>Husband/Partner’s Alcohol Consumption (N=4454)</b>                  |      |       |
| No                                                                     | 2978 | 66.86 |
| Yes                                                                    | 1476 | 33.14 |
| <b>Wealth Index (N=4813)</b>                                           |      |       |
| Poorest                                                                | 776  | 16.12 |
| Poorer                                                                 | 761  | 15.81 |
| Middle                                                                 | 948  | 19.70 |
| Richer                                                                 | 1089 | 22.63 |
| Richest                                                                | 1239 | 25.74 |

| <b>Type of Place of Residence (N=4813)</b> |      |       |
|--------------------------------------------|------|-------|
| Rural                                      | 2891 | 60.07 |
| Urban                                      | 1922 | 39.93 |
| <b>Province of Residence (N=4813)</b>      |      |       |
| Niassa                                     | 439  | 9.12  |
| Cabo Delgado                               | 524  | 10.89 |
| Nampula                                    | 552  | 11.47 |
| Zambézia                                   | 376  | 7.81  |
| Tete                                       | 469  | 9.74  |
| Manica                                     | 405  | 8.41  |
| Sofala                                     | 447  | 9.29  |
| Inhambane                                  | 353  | 7.33  |
| Gaza                                       | 413  | 8.58  |
| Maputo                                     | 438  | 9.10  |
| Cidade de Maputo                           | 397  | 8.25  |

223 \*Some variables have missing data points, so each frequency is a proportion of the available data points for that  
 224 question.

225 <sup>a</sup>Wealth Index: Composite score derived from participants' household assets using principal component analysis  
 226

## 227 **Prevalence of Lifetime IPV**

228 Nearly 1 in 4 (23.07%) women reported that they had experienced physical abuse from a  
 229 current or former partner since the age of 15 (**Fig 1**). This prevalence is similar to the IPV  
 230 experienced within the preceding 12 months (21.34%) (**S3 Fig**). Figure 2 shows the breakdown of  
 231 regional variation in Lifetime IPV across all provinces. Manica had the highest rate at 37.3%,  
 232 followed by Cabo Delgado at 27.1% and Sofala at 28.4%. The lowest prevalence was found in  
 233 Tete at 14.8% and Niassa at 9.6%.

234 **[Figure 1. The prevalence of Lifetime Intimate Partner Violence (IPV) among women in**  
 235 **Mozambique, based on the 2022-2023 DHS study, with a prevalence of 23.07% (N=4813)]**

236

237 **[Figure 2. Provincial variation in the prevalence of Lifetime Intimate Partner Violence (IPV)**  
 238 **among women in Mozambique, as reported in the 2022-2023 DHS study, highlighting the**  
 239 **highest prevalence in Manica and the lowest in Niassa (N=4813)]**

240

## 241 Individual-Level Factors Associated with the Prevalence of Lifetime IPV

242 Several individual-level factors were significantly associated with Lifetime IPV in this study  
 243 (Table 2). Marital status was a strong determinant; women with a partner having a 61.7% higher  
 244 likelihood of experiencing Lifetime IPV compared to those who had never been in a union (aOR  
 245 1.617, 95% CI 1.288, 2.029). Women who are no longer with a partner had 78.7% higher odds of  
 246 Lifetime IPV (aOR: 1.787, 95% CI 1.372, 2.328). Education also played a role, women with higher  
 247 than secondary education reporting decreased odds of Lifetime IPV (aOR: 0.656, 95% CI 0.449,  
 248 0.958). Employment status was another key factor; employed women had a 33.9% increased  
 249 likelihood of experiencing Lifetime IPV compared to those not employed (aOR: 1.339, 95% CI  
 250 1.138, 1.576). Justification for beating was positively associated with Lifetime IPV; women  
 251 expressing moderate degree of justification having 40.8% higher odds of Lifetime IPV (aOR:  
 252 1.408, 95% CI 1.114, 1.772) compared to those who did not justify violence. Husband/partner's  
 253 alcohol consumption was one of the strongest predictors. Husbands/partner's alcohol drinking  
 254 nearly tripled the odds of Lifetime IPV (aOR: 2.928, 95% CI 2.492, 3.443).

255 **Table 2. Results from the Multivariable Analysis, Full Model Showing Significant Factors at**  
 256 **Individual- and Context-level and Lifetime Intimate Partner Violence. Demographic and**  
 257 **Health Survey, 2022-2023, Mozambique**

| Independent Variables        | History of IPV       |         |
|------------------------------|----------------------|---------|
|                              | Adjusted OR [95% CI] | p-value |
| <b>Woman's Age</b>           |                      | 0.3871  |
| 15 – 24                      | 1.00 [Ref]           |         |
| 25 – 34                      | 1.101 [0.890,1.363]  |         |
| 35 – 44                      | 1.039 [0.801,1.347]  |         |
| ≥ 45                         | 0.867 [0.621,1.205]  |         |
| <b>Husband/Partner's Age</b> |                      | 0.1029  |
| 15 – 24                      | 1.00 [Ref]           |         |
| 25 – 34                      | 1.250 [0.924,1.700]  |         |

|                                              |                      |                   |
|----------------------------------------------|----------------------|-------------------|
| ≥ 35                                         | 1.426 [1.028,1.9]    |                   |
|                                              |                      |                   |
| <b>Woman's Marital Status</b>                |                      | <b>&lt;0.0001</b> |
| Never in Union                               | 1.00 [Ref]           |                   |
| Married                                      | 0.972 [0.744, 1.270] |                   |
| Living with a Partner                        | 1.617 [1.288, 2.029] |                   |
| No longer living together/separated          | 1.787 [1.372, 2.328] |                   |
|                                              |                      |                   |
| <b>Woman's Educational Level</b>             |                      | 0.0894            |
| No Formal Education                          | 1.00 [Ref]           |                   |
| Primary                                      | 1.044 [0.851, 1.280] |                   |
| Secondary                                    | 1.116 [0.923, 1.349] |                   |
| Higher                                       | 0.656 [0.449, 0.958] |                   |
|                                              |                      |                   |
| <b>Husband/Partner's Educational Level</b>   |                      | 0.3465            |
| No Formal Education                          | 1.00 [Ref]           |                   |
| Primary                                      | 1.044 [0.844,1.292]  |                   |
| Secondary Education or Higher                | 0.876 [0.670,1.144]  |                   |
|                                              |                      |                   |
|                                              |                      |                   |
| <b>Woman's Current Employment Status</b>     |                      | <b>0.0004</b>     |
| No                                           | 1.00 [Ref]           |                   |
| Yes                                          | 1.339 [1.138,1.576]  |                   |
|                                              |                      |                   |
| <b>Woman's Justification for Beating</b>     |                      | <b>0.0059</b>     |
| No justification                             | 1.00 [Ref]           |                   |
| Moderate Justification                       | 1.408 [1.114,1.772]  |                   |
| Moderate-to-complete Justification           | 1.286 [0.967,1.698]  |                   |
|                                              |                      |                   |
| <b>Husband/Partner's Alcohol Consumption</b> |                      | <b>&lt;0.0001</b> |
| No                                           | 1.00 [Ref]           |                   |
| Yes                                          | 2.928 [2.492,3.443]  |                   |
|                                              |                      |                   |
| <b>Type of Place of Residence</b>            |                      | 0.1515            |
| Rural                                        | 0.877 [0.734,1.050]  |                   |
| Urban                                        | 1.00 [Ref]           |                   |
|                                              |                      |                   |
| <b>Province of Residence</b>                 |                      | <b>&lt;0.0001</b> |
| Niassa                                       | 0.445 [0.291,0.672]  |                   |
| Cabo Delgado                                 | 1.640 [1.163,2.318]  |                   |
| Nampula                                      | 1.340 [0.939,1.915]  |                   |
| Zambézia                                     | 1.034 [0.707,1.508]  |                   |
| Tete                                         | 1.139 [0.807,1.607]  |                   |
| Manica                                       | 2.660 [1.899,3.738]  |                   |

|                                                           |                      |                |
|-----------------------------------------------------------|----------------------|----------------|
| Sofala                                                    | 1.143 [0.822,1.590]  |                |
| Inhambane                                                 | 0.679 [0.472,0.973]  |                |
| Gaza                                                      | 0.570 [0.391,0.826]  |                |
| Maputo                                                    | 1.00 [Ref]           |                |
| Cidade de Maputo                                          | 1.108 [0.786,1.562]  |                |
|                                                           |                      |                |
| <b>Woman's Educational Level X Woman's Marital Status</b> |                      | <b>0.0078</b>  |
| Primary X Married                                         | 1.348 [0.857,2.119]  |                |
| Primary X Living with a Partner                           | 2.266 [1.517, 3.384] |                |
| Primary X No longer living together/separated             | 1.777 [1.122, 2.813] |                |
| Secondary X Married                                       | 1.363 [0.864, 2.152] |                |
| Secondary X Living with a Partner                         | 1.482 [1.001, 2.193] |                |
| Secondary X No longer living together/separated           | 1.909 [1.204, 3.025] |                |
| Higher X Married                                          | 0.308 [0.137, 0.695] |                |
| Higher X Living with a Partner                            | 1.396 [0.688, 2.835] |                |
| Higher X No longer living together/separated              | 1.543 [0.686, 3.471] |                |
|                                                           |                      |                |
| <b>Model Fitness</b>                                      | <b>Chi-Square</b>    | <b>p-value</b> |
| Hosmer-Lemeshow                                           | 6.6669               | 0.5730         |

259 \*All boldened p-values are statistically significant

260 ¶Interaction Term: Woman's Education X Marital Status

261 <sup>a</sup> Full list of variables included in initial analysis: Woman's Age, Husband/Partner's Age, Woman's Marital Status,  
 262 Woman's Educational Level, Husband/Partner's Educational Level, Woman's Current Employment Status, Woman's  
 263 Access to Media, Woman's Justification for Beating from Husband, Husband/Partner's Alcohol Consumption, Wealth  
 264 Index, Type of Place of Residence, Province of Residence. All non-significant variables (p<0.20) were subsequently  
 265 excluded from multivariate analysis.

266

267 An effect modification involving women's educational level and marital status was also  
 268 observed. Women with primary education who were living with a partner (aOR: 2.266, 95% CI  
 269 1.517, 3.384) or separated (aOR: 1.777, 95% CI 1.122, 2.813) had significantly higher odds of  
 270 Lifetime IPV compared to those with no formal education who had never been in a union. For  
 271 women with secondary education, those living with a partner (aOR: 1.482, 95% CI 1.001, 2.193)  
 272 or separated (aOR: 1.909, 95% CI 1.204, 3.025) also had increased odds of Lifetime IPV. Figure  
 273 3 further illustrates the interaction between women's educational level and marital status and the  
 274 associated probabilities of Lifetime IPV.

275 **[Figure 3. Interaction plot showing the predicted probabilities of experiencing Lifetime IPV**  
 276 **across education levels and marital statuses. Higher education reduces the likelihood of**

277 **Lifetime IPV, especially for married women, while those living with a partner or separated**  
278 **show consistently higher probabilities across all education levels.]**

279  
280 For women with no formal education, those who have never been in a union show the lowest  
281 probability of IPV, while the highest probabilities are seen in those living with a partner or no  
282 longer living together. Among women with primary education, IPV probabilities are similar for  
283 those who are married or living with a partner, ranging from 0.22 to 0.30, while the gap between  
284 these groups and those never in union becomes more distinct. In secondary education, the  
285 probability of IPV increases slightly for married or partnered women, with separated women  
286 showing the highest IPV likelihood. For women with higher education, the probability of IPV  
287 decreases significantly for married individuals, but remains relatively high, around 0.30–0.33, for  
288 those living with a partner or separated. Overall, being married appears to reduce the probability  
289 of IPV as education increases, while the risks for those living with a partner or separated remain  
290 elevated across all education levels.

### 291 **Context-Level Factors Associated with the Prevalence of Lifetime IPV**

292 The province of residence significantly impacted Lifetime IPV prevalence. Women from  
293 Cabo Delgado (aOR: 1.640, 95% CI 1.163, 2.318) and Manica (aOR: 2.660, 95% CI 1.899, 3.738)  
294 were at substantially higher odds of experiencing Lifetime IPV than those in Maputo. Conversely,  
295 women from Niassa (aOR: 0.445, 95% CI 0.291, 0.672), Inhambane (aOR: 0.679, [95% CI: 0.472,  
296 0.973]), and Gaza (aOR: 0.570, 95% CI 0.391, 0.826) were less likely to experience IPV. No other  
297 context-level variables were significantly associated with Lifetime IPV. The Hosmer-Lemeshow  
298 test indicated a good fit for the logistic regression model ( $\chi^2 = 6.67$ ,  $p = 0.573$ ).

## 299 **Discussion**



300 Our study explored the prevalence and determinants of Lifetime IPV among women in  
301 Mozambique using data from the 2022-2023 Mozambique DHS. The study highlights key  
302 individual-level factors influencing IPV prevalence, including marital status, educational  
303 attainment, employment, justification of violence, and husband/partner's alcohol consumption.  
304 We also found a significant effect modifier involving marital status and education level. On a  
305 contextual level, the study revealed regional disparities in IPV prevalence with women in Cabo  
306 Delgado and Manica reporting the highest IPV experiences.

307 Our study also revealed that marital status strongly influences the prevalence of Lifetime  
308 IPV. Women who were married, cohabitating, or separated were more likely to have experienced  
309 IPV in their lifetime than those who were not in a union. These findings align with the literature  
310 on this topic.(3,7,25) Studies show that IPV rates are higher among women with husbands/partners  
311 because men often use physical violence as a means to discipline as well as assert power and  
312 dominance over their wives/female partners.(25,26) Furthermore, women's excessive reliance on  
313 their husbands/partners, in traditional Sub-Saharan African settings, further contributes to the high  
314 prevalence of IPV in certain cultures.(7,26)

315 Interestingly, our findings indicate that a woman's education and employment are associated  
316 with a higher likelihood of experiencing IPV during her lifetime. This is notable since education  
317 and jobs are considered strong indicators of women's autonomy and their financial and social  
318 power.(3,7,13) This somewhat counter-intuitive finding can be attributed to the deep-rooted rigid  
319 socio-cultural and gender norms found in many African countries.(3,8,15,17,20,25,27) As noted  
320 by Izugbara et al, educated and financially stable women may disrupt, even challenge, men's  
321 traditional perceptions of their role as leaders, decision-makers, and primary providers in the  
322 household.(25) Thus, for men who strongly embrace conventional masculine norms, including

323 male authority and dominance, this shift can heighten tensions and raise the risk of physical  
324 abuse.(25) Furthermore, some studies suggest that when husbands/partners are better educated or  
325 have higher-paying jobs, a woman's education or occupation may not increase her risk of IPV, as  
326 power dynamics in this type of unions still favor men.(3,8,26) Our study however did not find any  
327 impact of husbands/partner's education on IPV prevalence.

328 Consistent with existing literature, this study found that women's justification of physical  
329 abuse significantly raised their odds of experiencing IPV.(7,15) One study estimates that women's  
330 justification of physical abuse increases their likelihood of experiencing IPV by 30% while another  
331 study estimates a 57% higher odds of experiencing physical abuse.(7,25) A woman's acceptance  
332 and justification of physical abuse are shaped by community attitudes that favor physical violence  
333 while dismissing female victimization. This context and environment not only increases the  
334 likelihood of being a victim but also pressures IPV victims to remain silent and accept the  
335 abuse.(4,15)

336 Another strong predictor of Lifetime IPV is a husband/partner's alcohol consumption. We  
337 found that women whose husbands/partners consumed alcohol were more than twice as likely to  
338 experience IPV in their lifetime than those whose husbands/partners did not drink. Other studies  
339 have shown even stronger evidence that a husband/partner's alcohol abuse increases the risk of  
340 experiencing abuse.(27–29) For instance, Olagbuji and colleagues found that having a partner who  
341 consumes alcohol raises the odds of experiencing IPV by 11 times.(29) Some sources suggest that  
342 alcohol consumption or addiction may lead men to neglect their families, increasing tensions in  
343 their intimate relationships that could result in physical abuse.(7) Others argue that alcohol  
344 consumption triggers immediate biological changes in men that lead to increased aggression and  
345 abuse toward their partners.(18)

346 Notably, the effect modification between marital status and education highlights how the  
347 intersection of these two individual-level factors can either heighten or mitigate the likelihood of  
348 experiencing IPV. This finding emphasizes the importance of recognizing how multiple  
349 dimensions of a woman's identity and social position, intersect to shape her vulnerability to IPV  
350 in Mozambique. Higher educational attainment in women is typically linked to greater autonomy  
351 and resource access, which can reduce IPV risk.(30,31) However, in the contexts of strong  
352 traditional gender norms, educated women in intimate partner relationships might still greater  
353 vulnerability to experiencing IPV as their greater autonomy and independence challenge societal  
354 roles.(32) An intersectional approach provides a deeper understanding of these complexities and  
355 helps target effective interventions and policies.

356 On the contextual level, IPV prevalence varied by province, with Cabo Delgado and Manica  
357 having the highest statistics, and Inhambane and Gaza having the lowest. This disparity in IPV  
358 prevalence could be related to unequal wealth distribution across the country. According to a 2018  
359 World Bank report, southern provinces like Inhambane, Gaza, Maputo, and Maputo City have  
360 smaller wealth distribution gaps between rural and urban areas and have a more even distribution  
361 of basic services, compared to others like Cabo Delgado, Manica, and Niassa.(33) Thus, unequal  
362 wealth and resource distribution in some provinces can worsen economic hardship, power  
363 imbalances, and psychological strain in relationships, increasing women's vulnerability to IPV in  
364 their lifetime.

## 365 **Strengths and Limitations**

366 The biggest strength of this study is that it utilized the most current data from a large,  
367 nationally representative dataset to provide a detailed analysis of Lifetime IPV prevalence, making  
368 our results generalizable to all women between 15 and 49 years in Mozambique. Additionally, our

369 analysis effectively examined both individual- and contextual-level factors, therefore offering a  
370 holistic view of the phenomenon of IPV in the country. Furthermore, the study identified  
371 significant effect modification results between marital status and education, contributing to the  
372 understanding of how multiple dimensions of a woman's identity affect IPV prevalence. Again,  
373 our study highlights important provincial variations in IPV prevalence, helping to identify high-  
374 risk areas of IPV that will guide tailored interventions accordingly.

375 Despite these strengths, some limitations exist. For example, the cross-sectional nature of the  
376 study prevents us from establishing a causal relationship between the independent variables and  
377 Lifetime IPV. Due to the stigma regarding IPV, some women may refuse to disclose their  
378 experience of abuse, leading to underreporting, and potentially skewing the final results.  
379 Furthermore, the use of self-report questionnaires could lead to non-differential misclassification  
380 and/or recall bias.

## 381 **Conclusion**

382 Our study utilized the Mozambique DHS 2022-2023 data to examine the current prevalence  
383 of Lifetime IPV in the country and to identify the specific individual and contextual factors  
384 contributing to it. Our findings showed that almost 1 in 4 women experienced IPV in their lifetime.  
385 Marital status emerged as a key factor, with women who are currently married, cohabitating, or  
386 separated being at the highest odds of experiencing IPV in their lives. Educational attainment and  
387 current employment also played critical roles. Higher education levels and current employment  
388 correlated with increased IPV prevalence. Furthermore, the justification of violence significantly  
389 influenced IPV prevalence. Similarly, husbands/partners' consumption of alcohol was strongly

390 associated with Lifetime IPV prevalence. Finally, provincial disparities in Lifetime IPV were  
391 evident, with notably higher IPV estimates in Cabo Delgado and Manica.

392 Overall, our findings underscore the importance of targeted interventions that address socio-  
393 cultural norms, improve educational opportunities, mitigate alcohol consumption, and implement  
394 province-specific strategies to effectively combat Lifetime IPV and enhance women's health and  
395 safety in Mozambique.

396

## 397 **Author Contributions**

398 Conceptualization: MM and NM; Formal Analysis: MM and NM; Methodology: MM and NM;  
399 Supervision: NM; Funding and Provenance: NM; Writing – Original draft: MM. Writing – Review  
400 & Editing: NM.

401

## 402 **Acknowledgments**

403 We thank Md Sabbir Ahmed, Nahin Shakurun, and Fernanda Andre for providing critical feedback  
404 during the conceptualization and manuscript writing processes of the project. We also appreciate  
405 the overall support and encouragement of all the Mozambique-Canada Maternal Health (MCMH)  
406 project colleagues.

407

408

409

410

411

412

413

414

415  
416  
417  
418  
419

## 420 **References**

- 421 1. Violence against women [Internet]. World Health Organization; [cited 2024 Aug 20].  
422 Available from: <https://www.who.int/news-room/fact-sheets/detail/violence-against-women#:~:text=Estimates%20published%20by%20WHO%20indicate,sexual%20violence%20in%20their%20lifetime>. In.
- 425 2. Muhajarine N, D'Arcy C. Physical abuse during pregnancy: prevalence and risk factors.  
426 *CMAJ*. 1999 Apr 6;160(7):1007–11.
- 427 3. Ahinkorah BO, Dickson KS, Seidu AA. Women decision-making capacity and intimate  
428 partner violence among women in sub-Saharan Africa. *Arch Public Health*. 2018 Jan  
429 29;76(1):5.
- 430 4. Cools S, Kotsadam A. Resources and Intimate Partner Violence in Sub-Saharan Africa.  
431 *World Development*. 2017 Jul 1;95:211–30.
- 432 5. WHO (World Health Organization) (2005) WHO Multi-Country Study on Women's Health  
433 and Domestic Violence Against Women: Initial Results on Prevalence, Health and Outcomes  
434 and Women's Responses. WHO, Geneva.
- 435 6. Vera Cruz G, Domingos L, Sabune A. The Characteristics of the Violence against Women in  
436 Mozambique. *Health*. 2014;06(13):1589–601.
- 437 7. Ahinkorah BO, Aboagye RG, Seidu AA, Frimpong JB, Hagan JE, Budu E, et al. Physical  
438 violence during pregnancy in sub-Saharan Africa: why it matters and who are most  
439 susceptible? *BMJ Open*. 2023 Jun 1;13(6):e059236.
- 440 8. Stöckl H, Hassan A, Ranganathan M, M Hatcher A. Economic empowerment and intimate  
441 partner violence: a secondary data analysis of the cross-sectional Demographic Health  
442 Surveys in Sub-Saharan Africa. *BMC Womens Health*. 2021 Jun 12;21(1):241.
- 443 9. González L, Rodríguez-Planas N. Gender norms and intimate partner violence. *Journal of*  
444 *Economic Behavior & Organization*. 2020 Oct 1;178:223–48.
- 445 10. Gage AJ, Thomas NJ. Women's Work, Gender Roles, and Intimate Partner Violence in  
446 Nigeria. *Arch Sex Behav*. 2017 Oct 1;46(7):1923–38.

- 447 11. Vyas S, Watts C. How does economic empowerment affect women's risk of intimate partner  
448 violence in low and middle income countries? A systematic review of published evidence.  
449 Journal of International Development. 2009;21(5):577–602.
- 450 12. Jewkes R, Levin J, Penn-Kekana L. Risk factors for domestic violence: findings from a  
451 South African cross-sectional study. Soc Sci Med. 2002 Nov;55(9):1603–17.
- 452 13. Das T, Basu Roy DT. More than individual factors; is there any contextual effect of  
453 unemployment, poverty and literacy on the domestic spousal violence against women? A  
454 multilevel analysis on Indian context. SSM - Population Health. 2020 Dec 1;12:100691.
- 455 14. White ME, Satyen L. Cross-cultural differences in intimate partner violence and depression:  
456 A systematic review. Aggression and Violent Behavior. 2015 Sep 1;24:120–30.
- 457 15. Zark L, Satyen L. Cross-Cultural Differences in Student Attitudes Toward Intimate Partner  
458 Violence: A Systematic Review. Trauma, Violence, & Abuse. 2022 Jul 1;23(3):1007–22.
- 459 16. Sardinha L, Nájera Catalán HE. Attitudes towards domestic violence in 49 low- and middle-  
460 income countries: A gendered analysis of prevalence and country-level correlates. PLoS  
461 One. 2018;13(10):e0206101.
- 462 17. Jethá E, Keygnaert I, Martins E, Sidat M, Roelens K. Domestic violence in Mozambique:  
463 from policy to practice. BMC Public Health. 2021 Apr 22;21(1):772.
- 464 18. Chester DS, DeWall CN. The roots of intimate partner violence. Current Opinion in  
465 Psychology. 2018 Feb 1;19:55–9.
- 466 19. National Institute of Statistics (INE) and ICF. 2024. Mozambique Demographic and Health  
467 Survey 2022-23. [https://dhsprogram.com/publications/publication-FR389-DHS-Final-  
468 Reports.cfm](https://dhsprogram.com/publications/publication-FR389-DHS-Final-Reports.cfm) (2024).
- 469 20. Slegh H. Gender-based violence and women's search for care in Mozambique. 2010;
- 470 21. Ali PA, Gavino MIB. Violence against women in Pakistan: a framework for analysis. J Pak  
471 Med Assoc. 2008 Apr;58(4):198–203.
- 472 22. Tembe C, Nhanzimo A, Magaua M, Cordeiro B, Balate A, Maunze X, et al. IV  
473 Recenseamento Geral da População e Habitação 2017. Maputo: Instituto Nacional de  
474 Estatística; 2017 p. 1–214. Report No.: IV.
- 475 23. ICF. Guide to DHS Statistics: DHS-8. ICF; 2020. Available from:  
476 <https://dhsprogram.com/data/Guide-to-DHS-Statistics/index.htm>.
- 477 24. Azevêdo AC da C, Araújo TVB de, Valongueiro S, Ludermir AB. Intimate partner violence  
478 and unintended pregnancy: prevalence and associated factors. Cad Saude Publica. 2013  
479 Dec;29(12):2394–404.

- 480 25. Izugbara CO, Obiyan MO, Degfie TT, Bhatti A. Correlates of intimate partner violence  
481 among urban women in sub-Saharan Africa. *PLOS ONE*. 2020 Mar 25;15(3):e0230508.
- 482 26. Sikweyiya Y, Addo-Lartey AA, Alangea DO, Dako-Gyeke P, Chirwa ED, Coker-Appiah D,  
483 et al. Patriarchy and gender-inequitable attitudes as drivers of intimate partner violence  
484 against women in the central region of Ghana. *BMC Public Health*. 2020 May 13;20(1):682.
- 485 27. Mossie TB, Mekonnen Fenta H, Tadesse M, Tadele A. Mapping the disparities in intimate  
486 partner violence prevalence and determinants across Sub-Saharan Africa. *Front Public*  
487 *Health* [Internet]. 2023 Jun 28 [cited 2024 Aug 21];11. Available from:  
488 <https://www.frontiersin.org/journals/public-health/articles/10.3389/fpubh.2023.1188718/full>
- 489 28. Shamu S, Abrahams N, Temmerman M, Musekiwa A, Zarowsky C. A Systematic Review of  
490 African Studies on Intimate Partner Violence against Pregnant Women: Prevalence and Risk  
491 Factors. *PLOS ONE*. 2011 Mar 8;6(3):e17591.
- 492 29. Olagbuji B, Ezeanochie M, Ande A, Ekaete E. Trends and determinants of pregnancy-related  
493 domestic violence in a referral center in southern Nigeria. *Int J Gynaecol Obstet*. 2010  
494 Feb;108(2):101–3.
- 495 30. Jewkes R, Flood M, Lang J. From work with men and boys to changes of social norms and  
496 reduction of inequities in gender relations: a conceptual shift in prevention of violence  
497 against women and girls. *Lancet*. 2015 Apr 18;385(9977):1580–9.
- 498 31. Crenshaw K. Mapping the Margins: Intersectionality, Identity Politics, and Violence against  
499 Women of Color. *Stanford Law Review*. 1991;43(6):1241–99.
- 500 32. Mshweshwe L. Understanding domestic violence: masculinity, culture, traditions. *Heliyon*.  
501 2020 Oct 27;6(10):e05334.
- 502 33. World Bank Group. Findings of the Mozambique Water Supply, Sanitation, and Hygiene  
503 Poverty Diagnostic [Internet]. World Bank, Washington, DC; 2018 [cited 2024 Aug 22].  
504 Available from: <https://hdl.handle.net/10986/29528>

505

## 506 **Supporting Information List**

507

508 **S1 Figure.** The theoretical framework of physical violence against women during pregnancy.  
509 Four different levels contribute to the risk of physical violence during pregnancy. Level 1 includes  
510 contextual factors, Level 2 includes both a woman and her husband/partners socio-demographic  
511 indicators, Level 3 encompasses the dynamics within the relationship between a woman and her  
512 husband/partner, and Level 4 contains factors associated with the woman’s attitudes and intentions  
513 towards physical abuse. Adapted from intimate partner violence and unintended pregnancy  
514 framework by Azevêdo et al., (2013).

515



516 **S2 Table.** Details about Independent Variables and their Recode Status from Mozambique 2022-  
517 2023 Demographic and Health Survey Dataset

518

519 **S3 Figure.** The prevalence of Intimate Partner Violence (IPV) in the last 12 months among women  
520 in Mozambique, based on the 2022-2023 Demographic and Health Survey, with a prevalence of  
521 21.34% (N=4813)

522

523 **S4 Table.** Results from Bivariate Analyses Between All Independent Variables and History of  
524 Intimate Partner Violence. Demographic and Health Survey, 2022-2023, Mozambique

525

526

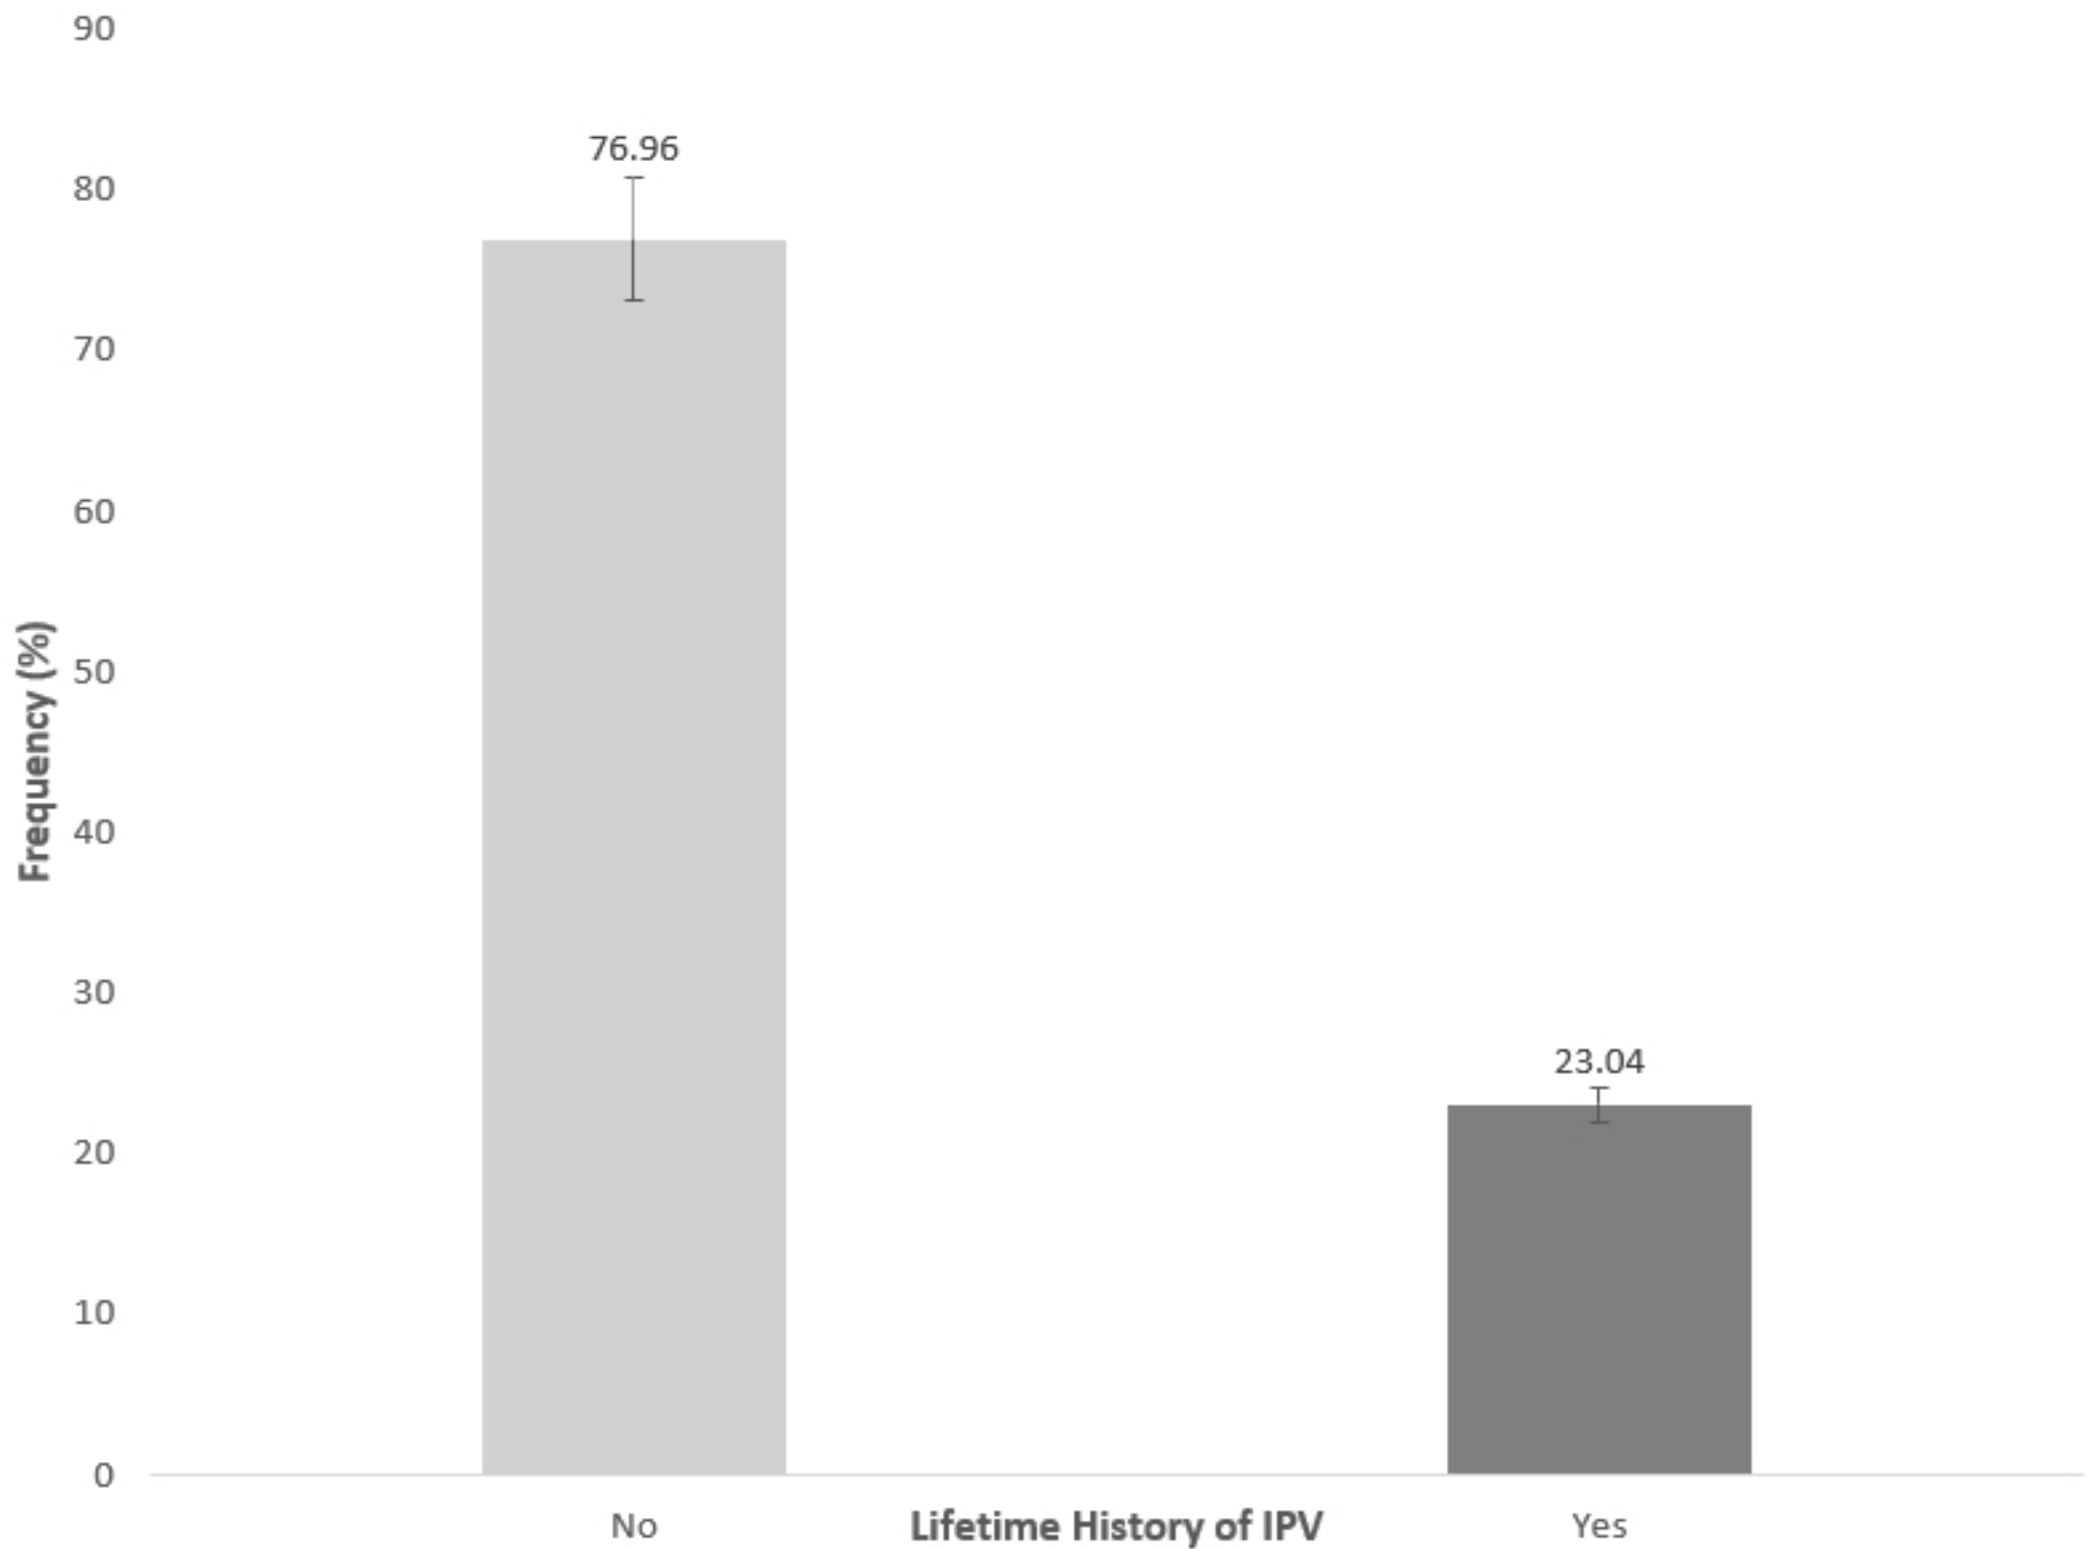

Prevalence of Lifetime IPV Among 15-to-49 Year Old Women Across Mozambican Provinces  
(DHS 2023 Report)

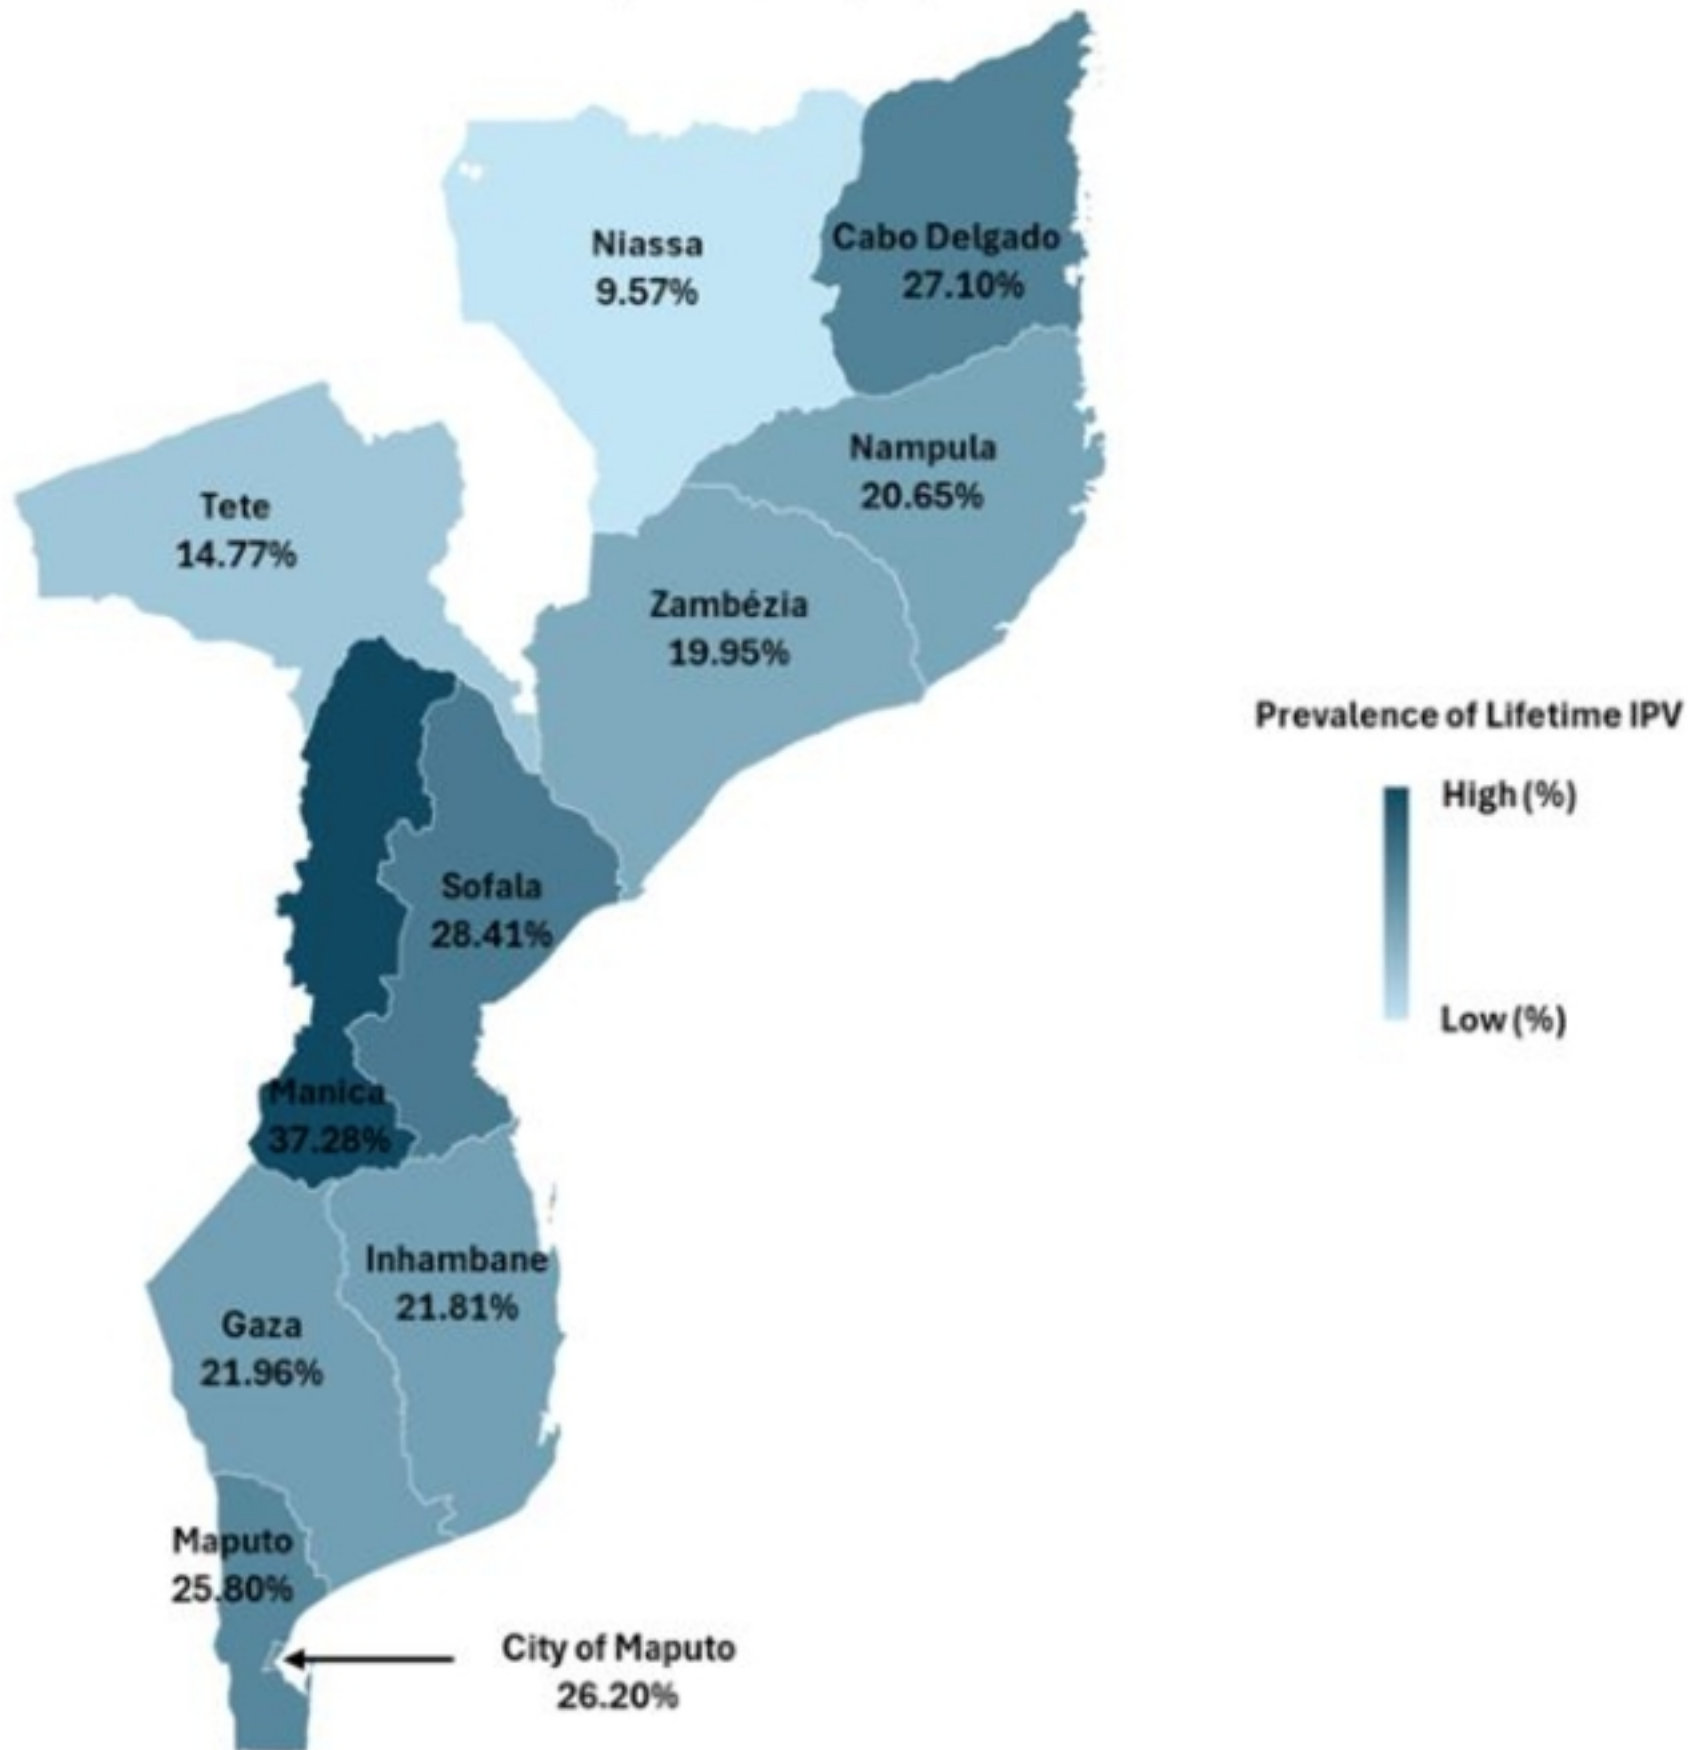

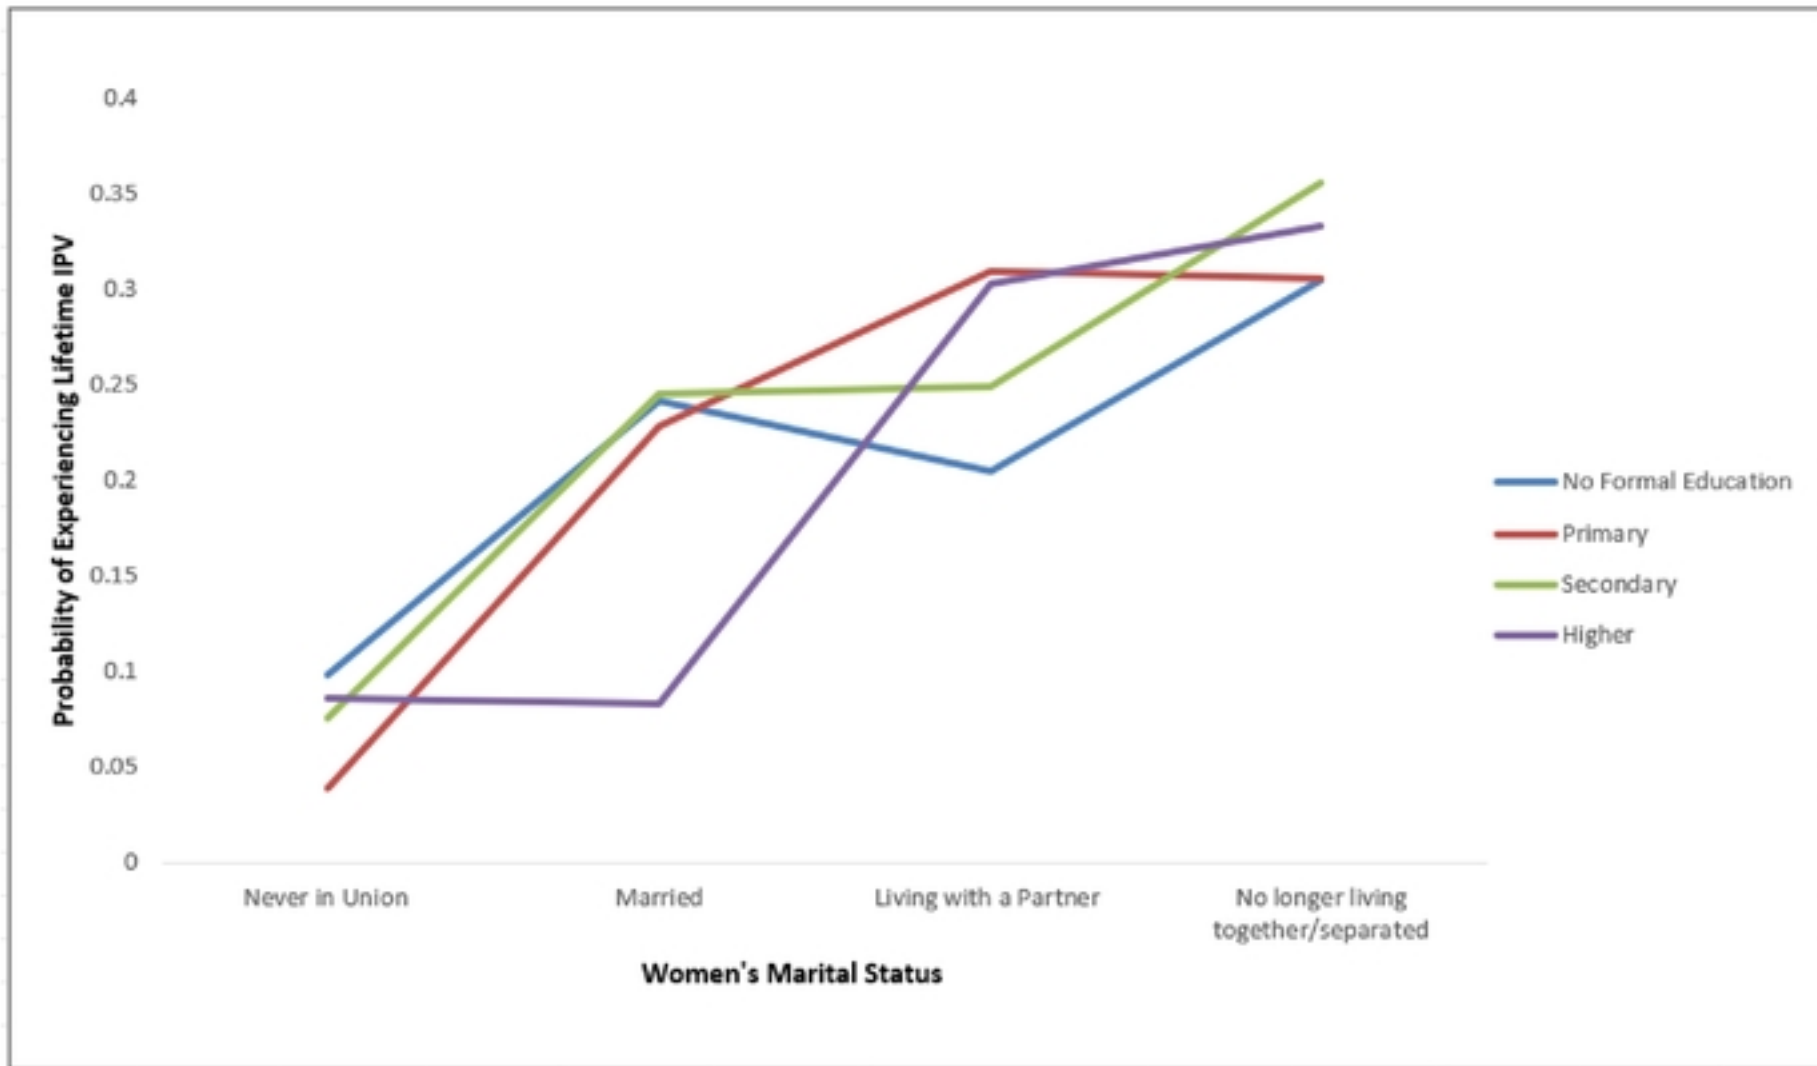

Source: https://medrxiv.org/content/10.1101/2024.10.12.24315379v1.full.pdf
